# Supplementary material for: Spine Metastasis Is Associated with the Development of Brain Metastasis in Non-Small-Cell Lung Cancer Patients
Source: MDPI journal article supplement (doi:10.3390/medicina60010152), 2024-01-14
Supplement: s1 [file s1]

**Table S1** Association of bone metastasis with BM at diagnosis

| Variables               | Univariate analysis |         | Multivariate analysis |         |
|-------------------------|---------------------|---------|-----------------------|---------|
|                         | OR (95% CI)         | p value | OR (95% CI)           | p value |
| Age                     |                     |         |                       |         |
| >69                     | reference           | -       |                       |         |
| ≤69                     | 1.28 (0.95–1.72)    | 0.109   |                       |         |
| Gender                  |                     |         |                       |         |
| Male                    | reference           | -       | reference             | -       |
| Female                  | 1.46 (1.08–1.98)    | 0.015   | 0.72 (0.41–1.26)      | 0.250   |
| Smoking history         |                     | -       |                       |         |
| Ever                    | reference           |         | reference             | -       |
| Never                   | 1.77 (1.30–2.40)    | <0.001  | 2.01 (1.13–3.60)      | 0.018   |
| ECOG performance status |                     |         |                       |         |
| 0–1                     | reference           | -       | reference             | -       |
| ≥2                      | 1.34 (0.99–1.82)    | 0.057   | 1.29 (0.94–1.77)      | 0.118   |
| Histology               |                     |         |                       |         |
| SQC                     | reference           | -       | reference             | -       |
| ADC                     | 1.91 (1.27–2.87)    | 0.002   | 1.52 (0.97–2.40)      | 0.070   |
| Others                  | 1.15 (0.59–2.23)    | 0.679   | 1.05 (0.53–2.08)      | 0.883   |
| EGFR mutation           |                     |         |                       |         |
| Negative                | reference           | -       | reference             | -       |
| Positive                | 1.48 (1.08–2.02)    | 0.014   | 1.01 (0.70–1.47)      | 0.950   |
| T category              |                     |         |                       |         |
| Tx–T1                   | reference           | -       | reference             | -       |
| T2                      | 1.65 (0.78–3.48)    | 0.187   | 1.56 (0.72–3.39)      | 0.262   |
| T3                      | 1.87 (0.91–3.85)    | 0.089   | 1.68 (0.79–3.58)      | 0.181   |
| T4                      | 1.87 (0.95–3.67)    | 0.072   | 1.61 (0.79–3.29)      | 0.187   |
| N category              |                     |         |                       |         |
| N0                      | reference           | -       | reference             | -       |
| N1                      | 1.34 (0.74–2.42)    | 0.332   | 1.45 (0.78–2.70)      | 0.245   |
| N2                      | 1.51 (0.96–2.37)    | 0.073   | 1.71 (1.06–2.76)      | 0.028   |
| N3                      | 1.55 (1.06–2.29)    | 0.026   | 1.44 (0.94–2.18)      | 0.091   |
| Bone metastasis         |                     |         |                       |         |
| No                      | reference           | -       | reference             | -       |
| Yes                     | 2.31 (1.71–3.12)    | <0.001  | 2.07 (1.50–2.84)      | <0.001  |

ECOG PS, Eastern Cooperative Oncology Group; SQC, squamous cell carcinoma, ADC, adenocarcinoma; EGFR, Epidermal growth factor receptor

**Table S2** Association of BM at diagnosis in patients with non-spine bone metastasis

| Variables               | Univariate analysis |         | Multivariate analysis |         |
|-------------------------|---------------------|---------|-----------------------|---------|
|                         | OR (95% CI)         | p value | OR (95% CI)           | p value |
| Age                     |                     |         |                       |         |
| >69                     | reference           | -       |                       |         |
| ≤69                     | 1.28 (0.95–1.72)    | 0.109   |                       |         |
| Gender                  |                     |         |                       |         |
| Male                    | reference           | -       | reference             | -       |
| Female                  | 1.46 (1.08–1.98)    | 0.015   | 0.74 (0.43–1.29)      | 0.284   |
| Smoking history         |                     | -       |                       |         |
| Ever                    | reference           |         | reference             | -       |
| Never                   | 1.77 (1.30–2.40)    | <0.001  | 2.04 (1.15–3.62)      | 0.015   |
| ECOG performance status |                     |         |                       |         |
| 0–1                     | reference           | -       | reference             | -       |
| ≥2                      | 1.34 (0.99–1.82)    | 0.057   | 1.37 (1.00–1.87)      | 0.050   |
| Histology               |                     |         |                       |         |
| SQC                     | reference           | -       | reference             | -       |
| ADC                     | 1.91 (1.27–2.87)    | 0.002   | 1.71 (1.09–2.68)      | 0.020   |
| Others                  | 1.15 (0.59–2.23)    | 0.679   | 1.15 (0.59–2.25)      | 0.686   |
| EGFR mutation           |                     |         |                       |         |
| Negative                | reference           | -       | reference             | -       |
| Positive                | 1.48 (1.08–2.02)    | 0.014   | 1.08 (0.75–1.56)      | 0.689   |
| T category              |                     |         |                       |         |
| Tx–T1                   | reference           | -       | reference             | -       |
| T2                      | 1.65 (0.78–3.48)    | 0.187   | 1.52 (0.71–3.28)      | 0.283   |
| T3                      | 1.87 (0.91–3.85)    | 0.089   | 1.61 (0.76–3.41)      | 0.210   |
| T4                      | 1.87 (0.95–3.67)    | 0.072   | 1.60 (0.79–3.23)      | 0.190   |
| N category              |                     |         |                       |         |
| N0                      | reference           | -       | reference             | -       |
| N1                      | 1.34 (0.74–2.42)    | 0.332   | 1.73 (0.93–3.20)      | 0.083   |
| N2                      | 1.51 (0.96–2.37)    | 0.073   | 1.86 (1.16–2.98)      | 0.010   |
| N3                      | 1.55 (1.06–2.29)    | 0.026   | 1.61 (1.07–2.43)      | 0.024   |
| Bone metastasis         |                     |         |                       |         |
| No                      | reference           | -       | reference             | -       |
| Yes                     | 0.91 (0.58–1.43)    | 0.679   | 0.89 (0.55–1.42)      | 0.615   |

ECOG PS, Eastern Cooperative Oncology Group; SQC, squamous cell carcinoma, ADC, adenocarcinoma; EGFR, Epidermal growth factor receptor
